# Supplementary material for: Homology-mediated end-capping as a primary step of sister chromatid fusion in the breakage-fusion-bridge cycles
Source: PubMed Central journal article supplement — Nucleic Acids Res. 2013 Aug 23;41(21):9732–40. doi: 10.1093/nar/gkt762 (PMC3834830; doi:10.1093/nar/gkt762), 2013-08-23
Supplement: supp_gkt762_nar-01370-d-2013-File008.pdf [file supp_gkt762_nar-01370-d-2013-File008.pdf]

Homology-mediated end-capping as a primary step of sister chromatid fusion in the Breakage-Fusion-Bridge cycles

Supplemental materials Table of Contents

Page 1 – Table of contents

Page 2 – Supplementary figure 1

A flowchart for defining the repeated (duplicated) sequence contents in GAPP-seq reads

Page 3 – Supplemental figure 2

Genomic locations of breakpoints and repetitive elements

Page 4-22 - Supplemental table 1

Read Depth analyses of GAPP-seq reads (the numbers of reads/kb for chr1: 149,701,000 - 150,800,000)

Page 23 – Supplemental table 2

PCR primers

## Supplementary figure 1- Marotta et al.

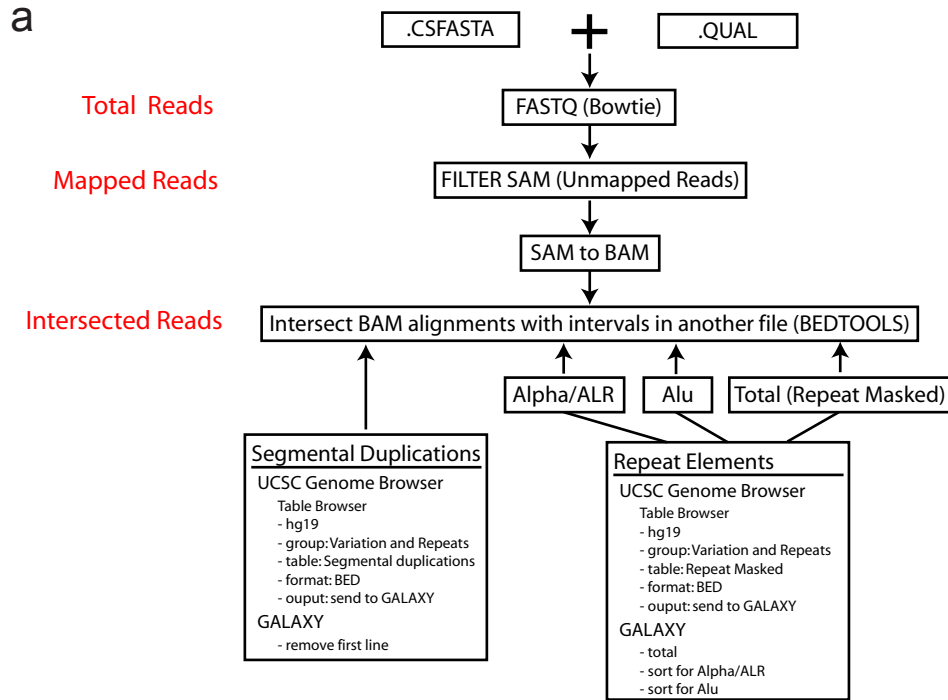

**b**

|                         | Size (bp)  | % of hg19 | Source                                                                                                                                          |
|-------------------------|------------|-----------|-------------------------------------------------------------------------------------------------------------------------------------------------|
| hg19                    | 3137161264 | 100.00    | <a href="http://humanparalogy.gs.washington.edu/build37/nr_chr.htm">http://humanparalogy.gs.washington.edu/build37/nr_chr.htm</a>               |
| Segmental Duplications  | 153622428  | 4.90      | <a href="http://humanparalogy.gs.washington.edu/build37/nr_chr.htm">http://humanparalogy.gs.washington.edu/build37/nr_chr.htm</a>               |
| Repeat Masked Total     | 1588344748 | 50.63     | <a href="http://genomewiki.ucsc.edu/index.php/Hg19_Genome_size_statistics">http://genomewiki.ucsc.edu/index.php/Hg19_Genome_size_statistics</a> |
| Alu elements            | 305076148  | 9.72      | Sum of size for 1142278 Alu sorted from hg19 repeat masker                                                                                      |
| Alpha satellite in hg19 | 7446336    | 0.24      | Sum of size for 1301 alpha satellites sorted from hg19 repeat masker                                                                            |

*a.* A flowchart for the analyses of repeated (duplicated) sequence contents in GAPF-seq reads

*b.* Repeated (duplicated) sequence contents in hg19

Supplemental figure 2 - Genomic locations of breakpoints and repetitive elements

*RPRD2* Breakpoint

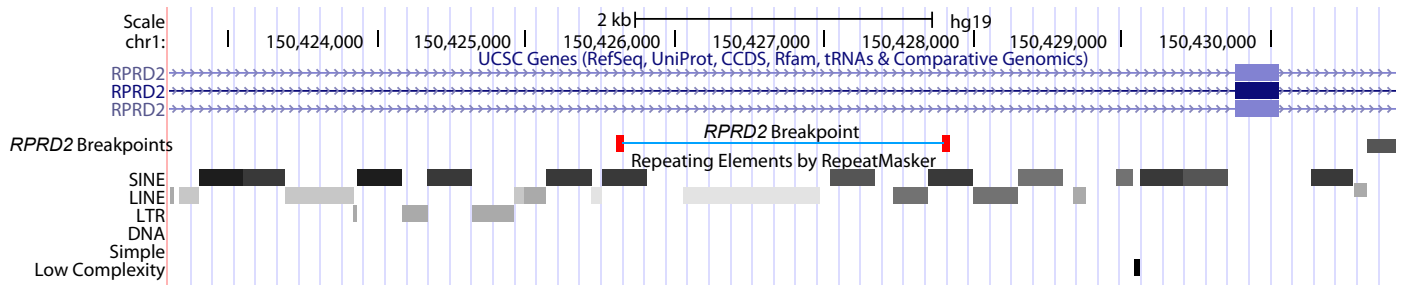

*TARS2-ECM1* Breakpoint

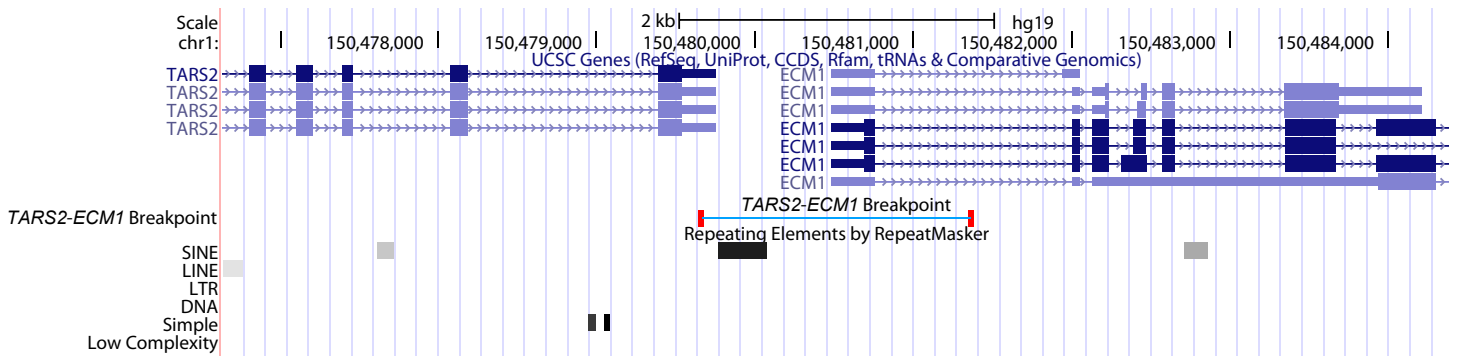

*ADAMSTL4* Breakpoint

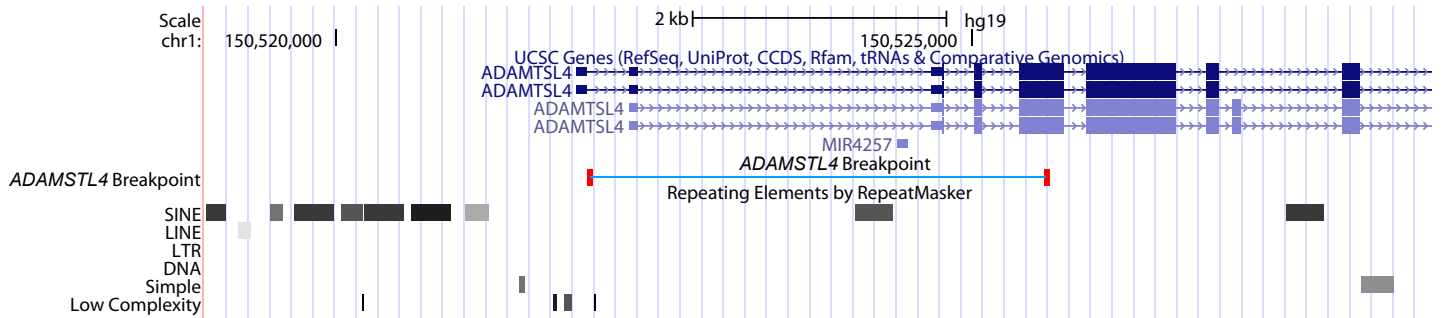

*MCL1* Breakpoints

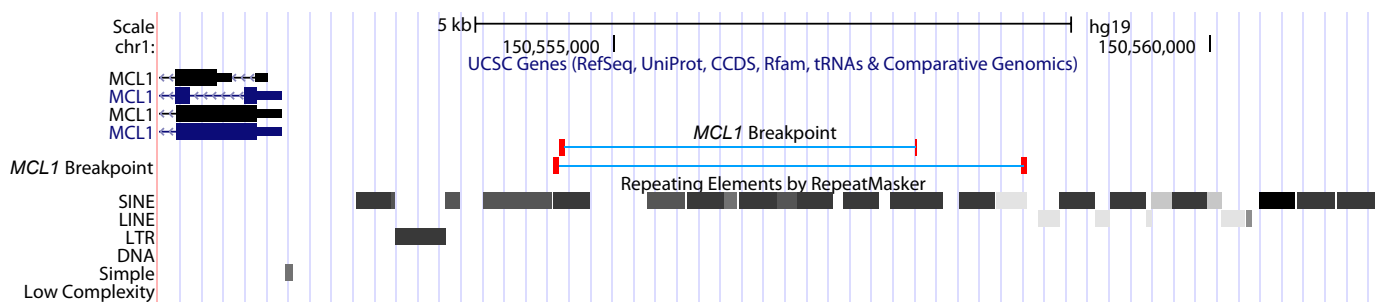

**Supplementary Table 1**

Read depth Analysis of GAPF reads (the # of reads/kb)

chr1: 149,701,000 - 150,800,000

| chr1      | Colo320DM | IMR90 |
|-----------|-----------|-------|
| 149701000 | 14        | 0     |
| 149702000 | 17        | 0     |
| 149703000 | 9         | 3     |
| 149704000 | 2         | 0     |
| 149705000 | 5         | 0     |
| 149706000 | 11        | 0     |
| 149707000 | 3         | 0     |
| 149708000 | 3         | 0     |
| 149709000 | 3         | 0     |
| 149710000 | 13        | 0     |
| 149711000 | 1         | 2     |
| 149712000 | 4         | 1     |
| 149713000 | 6         | 1     |
| 149714000 | 6         | 13    |
| 149715000 | 17        | 0     |
| 149716000 | 1         | 8     |
| 149717000 | 1         | 0     |
| 149718000 | 1         | 5     |
| 149719000 | 1         | 0     |
| 149720000 | 8         | 0     |
| 149721000 | 8         | 2     |
| 149722000 | 1         | 0     |
| 149723000 | 4         | 0     |
| 149724000 | 3         | 1     |
| 149725000 | 2         | 5     |
| 149726000 | 8         | 1     |
| 149727000 | 4         | 25    |
| 149728000 | 3         | 0     |
| 149729000 | 11        | 0     |
| 149730000 | 13        | 0     |
| 149731000 | 1         | 2     |
| 149732000 | 3         | 2     |
| 149733000 | 1         | 2     |
| 149734000 | 5         | 0     |
| 149735000 | 6         | 0     |
| 149736000 | 3         | 0     |
| 149737000 | 2         | 6     |
| 149738000 | 10        | 0     |
| 149739000 | 5         | 0     |
| 149740000 | 4         | 2     |
| 149741000 | 3         | 0     |
| 149742000 | 15        | 0     |
| 149743000 | 0         | 0     |
| 149744000 | 3         | 0     |
| 149745000 | 0         | 5     |
| 149746000 | 12        | 0     |
| 149747000 | 3         | 16    |
| 149748000 | 3         | 5     |
| 149749000 | 10        | 5     |
| 149750000 | 10        | 5     |
| 149751000 | 14        | 0     |
| 149752000 | 25        | 9     |
| 149753000 | 1         | 1     |
| 149754000 | 3         | 3     |

|           |    |    |
|-----------|----|----|
| 149755000 | 0  | 0  |
| 149756000 | 2  | 0  |
| 149757000 | 3  | 0  |
| 149758000 | 2  | 0  |
| 149759000 | 4  | 7  |
| 149760000 | 2  | 1  |
| 149761000 | 3  | 10 |
| 149762000 | 14 | 1  |
| 149763000 | 4  | 2  |
| 149764000 | 14 | 0  |
| 149765000 | 5  | 2  |
| 149766000 | 9  | 0  |
| 149767000 | 1  | 9  |
| 149768000 | 5  | 0  |
| 149769000 | 0  | 0  |
| 149770000 | 2  | 0  |
| 149771000 | 2  | 0  |
| 149772000 | 4  | 0  |
| 149773000 | 2  | 0  |
| 149774000 | 0  | 0  |
| 149775000 | 8  | 0  |
| 149776000 | 2  | 0  |
| 149777000 | 2  | 0  |
| 149778000 | 6  | 0  |
| 149779000 | 2  | 0  |
| 149780000 | 5  | 0  |
| 149781000 | 0  | 0  |
| 149782000 | 4  | 4  |
| 149783000 | 10 | 13 |
| 149784000 | 1  | 0  |
| 149785000 | 6  | 1  |
| 149786000 | 1  | 5  |
| 149787000 | 3  | 0  |
| 149788000 | 0  | 4  |
| 149789000 | 1  | 8  |
| 149790000 | 9  | 1  |
| 149791000 | 6  | 5  |
| 149792000 | 6  | 2  |
| 149793000 | 11 | 8  |
| 149794000 | 26 | 12 |
| 149795000 | 11 | 0  |
| 149796000 | 2  | 5  |
| 149797000 | 1  | 3  |
| 149798000 | 6  | 0  |
| 149799000 | 5  | 0  |
| 149800000 | 14 | 1  |
| 149801000 | 3  | 2  |
| 149802000 | 9  | 0  |
| 149803000 | 1  | 1  |
| 149804000 | 9  | 0  |
| 149805000 | 21 | 8  |
| 149806000 | 13 | 0  |
| 149807000 | 39 | 5  |
| 149808000 | 9  | 5  |
| 149809000 | 12 | 0  |
| 149810000 | 12 | 0  |
| 149811000 | 15 | 4  |
| 149812000 | 16 | 0  |
| 149813000 | 21 | 11 |

|           |    |    |
|-----------|----|----|
| 149814000 | 16 | 30 |
| 149815000 | 37 | 13 |
| 149816000 | 7  | 0  |
| 149817000 | 8  | 0  |
| 149818000 | 8  | 1  |
| 149819000 | 11 | 0  |
| 149820000 | 0  | 0  |
| 149821000 | 0  | 0  |
| 149822000 | 8  | 0  |
| 149823000 | 42 | 8  |
| 149824000 | 47 | 14 |
| 149825000 | 10 | 4  |
| 149826000 | 21 | 7  |
| 149827000 | 3  | 0  |
| 149828000 | 19 | 6  |
| 149829000 | 14 | 0  |
| 149830000 | 10 | 0  |
| 149831000 | 17 | 1  |
| 149832000 | 3  | 0  |
| 149833000 | 8  | 0  |
| 149834000 | 10 | 0  |
| 149835000 | 12 | 0  |
| 149836000 | 7  | 4  |
| 149837000 | 29 | 0  |
| 149838000 | 5  | 2  |
| 149839000 | 3  | 0  |
| 149840000 | 16 | 0  |
| 149841000 | 11 | 0  |
| 149842000 | 4  | 0  |
| 149843000 | 6  | 0  |
| 149844000 | 13 | 5  |
| 149845000 | 11 | 6  |
| 149846000 | 3  | 3  |
| 149847000 | 5  | 3  |
| 149848000 | 1  | 3  |
| 149849000 | 10 | 0  |
| 149850000 | 1  | 0  |
| 149851000 | 2  | 0  |
| 149852000 | 4  | 0  |
| 149853000 | 5  | 2  |
| 149854000 | 0  | 0  |
| 149855000 | 1  | 0  |
| 149856000 | 0  | 0  |
| 149857000 | 5  | 0  |
| 149858000 | 2  | 0  |
| 149859000 | 25 | 13 |
| 149860000 | 24 | 15 |
| 149861000 | 0  | 0  |
| 149862000 | 2  | 14 |
| 149863000 | 5  | 0  |
| 149864000 | 21 | 0  |
| 149865000 | 0  | 1  |
| 149866000 | 13 | 1  |
| 149867000 | 6  | 0  |
| 149868000 | 5  | 0  |
| 149869000 | 0  | 0  |
| 149870000 | 3  | 7  |
| 149871000 | 1  | 0  |
| 149872000 | 1  | 0  |

|           |    |    |
|-----------|----|----|
| 149873000 | 1  | 0  |
| 149874000 | 6  | 0  |
| 149875000 | 9  | 0  |
| 149876000 | 7  | 0  |
| 149877000 | 1  | 0  |
| 149878000 | 7  | 0  |
| 149879000 | 8  | 0  |
| 149880000 | 8  | 0  |
| 149881000 | 9  | 0  |
| 149882000 | 4  | 0  |
| 149883000 | 2  | 0  |
| 149884000 | 2  | 0  |
| 149885000 | 7  | 0  |
| 149886000 | 7  | 0  |
| 149887000 | 2  | 0  |
| 149888000 | 2  | 0  |
| 149889000 | 12 | 0  |
| 149890000 | 4  | 0  |
| 149891000 | 4  | 0  |
| 149892000 | 6  | 0  |
| 149893000 | 1  | 0  |
| 149894000 | 4  | 0  |
| 149895000 | 8  | 2  |
| 149896000 | 2  | 11 |
| 149897000 | 4  | 8  |
| 149898000 | 4  | 0  |
| 149899000 | 0  | 0  |
| 149900000 | 2  | 6  |
| 149901000 | 0  | 0  |
| 149902000 | 6  | 10 |
| 149903000 | 0  | 0  |
| 149904000 | 1  | 0  |
| 149905000 | 5  | 0  |
| 149906000 | 0  | 0  |
| 149907000 | 3  | 0  |
| 149908000 | 7  | 0  |
| 149909000 | 7  | 1  |
| 149910000 | 15 | 5  |
| 149911000 | 0  | 5  |
| 149912000 | 1  | 2  |
| 149913000 | 3  | 0  |
| 149914000 | 0  | 0  |
| 149915000 | 4  | 0  |
| 149916000 | 4  | 0  |
| 149917000 | 3  | 0  |
| 149918000 | 0  | 0  |
| 149919000 | 4  | 0  |
| 149920000 | 9  | 1  |
| 149921000 | 0  | 11 |
| 149922000 | 0  | 9  |
| 149923000 | 6  | 0  |
| 149924000 | 0  | 0  |
| 149925000 | 2  | 0  |
| 149926000 | 1  | 0  |
| 149927000 | 0  | 0  |
| 149928000 | 3  | 0  |
| 149929000 | 1  | 0  |
| 149930000 | 0  | 0  |
| 149931000 | 0  | 0  |

|           |    |    |
|-----------|----|----|
| 149932000 | 2  | 0  |
| 149933000 | 0  | 9  |
| 149934000 | 7  | 3  |
| 149935000 | 0  | 0  |
| 149936000 | 2  | 0  |
| 149937000 | 5  | 0  |
| 149938000 | 3  | 0  |
| 149939000 | 0  | 0  |
| 149940000 | 3  | 0  |
| 149941000 | 9  | 3  |
| 149942000 | 0  | 0  |
| 149943000 | 3  | 7  |
| 149944000 | 13 | 0  |
| 149945000 | 4  | 7  |
| 149946000 | 14 | 10 |
| 149947000 | 4  | 0  |
| 149948000 | 3  | 0  |
| 149949000 | 6  | 5  |
| 149950000 | 6  | 0  |
| 149951000 | 4  | 0  |
| 149952000 | 3  | 5  |
| 149953000 | 0  | 1  |
| 149954000 | 1  | 0  |
| 149955000 | 1  | 1  |
| 149956000 | 2  | 0  |
| 149957000 | 3  | 0  |
| 149958000 | 1  | 0  |
| 149959000 | 4  | 0  |
| 149960000 | 6  | 0  |
| 149961000 | 4  | 0  |
| 149962000 | 0  | 0  |
| 149963000 | 2  | 0  |
| 149964000 | 2  | 0  |
| 149965000 | 8  | 0  |
| 149966000 | 7  | 0  |
| 149967000 | 3  | 0  |
| 149968000 | 1  | 0  |
| 149969000 | 9  | 0  |
| 149970000 | 0  | 0  |
| 149971000 | 2  | 0  |
| 149972000 | 0  | 0  |
| 149973000 | 6  | 0  |
| 149974000 | 12 | 0  |
| 149975000 | 0  | 0  |
| 149976000 | 6  | 0  |
| 149977000 | 4  | 0  |
| 149978000 | 6  | 0  |
| 149979000 | 4  | 0  |
| 149980000 | 6  | 0  |
| 149981000 | 0  | 0  |
| 149982000 | 0  | 0  |
| 149983000 | 1  | 0  |
| 149984000 | 3  | 4  |
| 149985000 | 0  | 0  |
| 149986000 | 7  | 0  |
| 149987000 | 0  | 0  |
| 149988000 | 4  | 2  |
| 149989000 | 0  | 1  |
| 149990000 | 7  | 3  |



|           |    |    |
|-----------|----|----|
| 149991000 | 5  | 0  |
| 149992000 | 14 | 11 |
| 149993000 | 12 | 2  |
| 149994000 | 3  | 4  |
| 149995000 | 5  | 1  |
| 149996000 | 8  | 16 |
| 149997000 | 0  | 0  |
| 149998000 | 7  | 0  |
| 149999000 | 0  | 0  |
| 150000000 | 9  | 0  |
| 150001000 | 15 | 0  |
| 150002000 | 6  | 0  |
| 150003000 | 4  | 0  |
| 150004000 | 0  | 0  |
| 150005000 | 1  | 0  |
| 150006000 | 3  | 0  |
| 150007000 | 1  | 0  |
| 150008000 | 4  | 0  |
| 150009000 | 0  | 1  |
| 150010000 | 0  | 0  |
| 150011000 | 1  | 0  |
| 150012000 | 0  | 3  |
| 150013000 | 5  | 1  |
| 150014000 | 5  | 0  |
| 150015000 | 1  | 0  |
| 150016000 | 0  | 1  |
| 150017000 | 0  | 0  |
| 150018000 | 4  | 1  |
| 150019000 | 18 | 0  |
| 150020000 | 5  | 9  |
| 150021000 | 5  | 0  |
| 150022000 | 0  | 0  |
| 150023000 | 0  | 0  |
| 150024000 | 4  | 2  |
| 150025000 | 4  | 0  |
| 150026000 | 0  | 0  |
| 150027000 | 4  | 0  |
| 150028000 | 2  | 0  |
| 150029000 | 0  | 5  |
| 150030000 | 0  | 14 |
| 150031000 | 0  | 0  |
| 150032000 | 0  | 0  |
| 150033000 | 0  | 0  |
| 150034000 | 0  | 0  |
| 150035000 | 3  | 0  |
| 150036000 | 2  | 4  |
| 150037000 | 2  | 0  |
| 150038000 | 0  | 1  |
| 150039000 | 7  | 0  |
| 150040000 | 0  | 0  |
| 150041000 | 0  | 0  |
| 150042000 | 0  | 0  |
| 150043000 | 0  | 0  |
| 150044000 | 1  | 0  |
| 150045000 | 2  | 0  |
| 150046000 | 4  | 0  |
| 150047000 | 4  | 0  |
| 150048000 | 2  | 0  |
| 150049000 | 0  | 0  |

|           |    |   |
|-----------|----|---|
| 150050000 | 5  | 0 |
| 150051000 | 9  | 3 |
| 150052000 | 6  | 8 |
| 150053000 | 4  | 6 |
| 150054000 | 0  | 1 |
| 150055000 | 4  | 0 |
| 150056000 | 3  | 0 |
| 150057000 | 3  | 0 |
| 150058000 | 2  | 0 |
| 150059000 | 0  | 0 |
| 150060000 | 0  | 0 |
| 150061000 | 2  | 0 |
| 150062000 | 0  | 0 |
| 150063000 | 0  | 0 |
| 150064000 | 1  | 0 |
| 150065000 | 0  | 0 |
| 150066000 | 4  | 0 |
| 150067000 | 0  | 0 |
| 150068000 | 4  | 0 |
| 150069000 | 3  | 0 |
| 150070000 | 10 | 0 |
| 150071000 | 0  | 0 |
| 150072000 | 6  | 0 |
| 150073000 | 2  | 0 |
| 150074000 | 6  | 0 |
| 150075000 | 0  | 0 |
| 150076000 | 0  | 0 |
| 150077000 | 2  | 0 |
| 150078000 | 2  | 0 |
| 150079000 | 2  | 1 |
| 150080000 | 5  | 0 |
| 150081000 | 0  | 0 |
| 150082000 | 7  | 0 |
| 150083000 | 8  | 0 |
| 150084000 | 0  | 2 |
| 150085000 | 1  | 0 |
| 150086000 | 3  | 0 |
| 150087000 | 0  | 0 |
| 150088000 | 0  | 0 |
| 150089000 | 1  | 0 |
| 150090000 | 4  | 2 |
| 150091000 | 2  | 4 |
| 150092000 | 2  | 7 |
| 150093000 | 1  | 0 |
| 150094000 | 8  | 0 |
| 150095000 | 6  | 0 |
| 150096000 | 4  | 0 |
| 150097000 | 5  | 0 |
| 150098000 | 4  | 0 |
| 150099000 | 4  | 0 |
| 150100000 | 2  | 0 |
| 150101000 | 4  | 0 |
| 150102000 | 6  | 1 |
| 150103000 | 4  | 0 |
| 150104000 | 2  | 6 |
| 150105000 | 9  | 0 |
| 150106000 | 3  | 0 |
| 150107000 | 2  | 0 |
| 150108000 | 14 | 2 |

|           |    |    |
|-----------|----|----|
| 150109000 | 25 | 12 |
| 150110000 | 7  | 0  |
| 150111000 | 8  | 2  |
| 150112000 | 2  | 8  |
| 150113000 | 5  | 9  |
| 150114000 | 7  | 0  |
| 150115000 | 5  | 0  |
| 150116000 | 19 | 4  |
| 150117000 | 3  | 0  |
| 150118000 | 3  | 0  |
| 150119000 | 2  | 0  |
| 150120000 | 6  | 0  |
| 150121000 | 0  | 0  |
| 150122000 | 11 | 0  |
| 150123000 | 0  | 0  |
| 150124000 | 0  | 0  |
| 150125000 | 12 | 0  |
| 150126000 | 2  | 0  |
| 150127000 | 0  | 0  |
| 150128000 | 10 | 0  |
| 150129000 | 4  | 0  |
| 150130000 | 2  | 0  |
| 150131000 | 3  | 0  |
| 150132000 | 4  | 0  |
| 150133000 | 8  | 0  |
| 150134000 | 2  | 0  |
| 150135000 | 1  | 0  |
| 150136000 | 4  | 21 |
| 150137000 | 5  | 0  |
| 150138000 | 3  | 0  |
| 150139000 | 5  | 0  |
| 150140000 | 12 | 0  |
| 150141000 | 1  | 0  |
| 150142000 | 2  | 0  |
| 150143000 | 11 | 0  |
| 150144000 | 2  | 0  |
| 150145000 | 7  | 0  |
| 150146000 | 1  | 0  |
| 150147000 | 3  | 0  |
| 150148000 | 7  | 0  |
| 150149000 | 4  | 0  |
| 150150000 | 6  | 4  |
| 150151000 | 2  | 1  |
| 150152000 | 4  | 0  |
| 150153000 | 9  | 0  |
| 150154000 | 5  | 13 |
| 150155000 | 11 | 6  |
| 150156000 | 3  | 0  |
| 150157000 | 4  | 8  |
| 150158000 | 0  | 0  |
| 150159000 | 2  | 0  |
| 150160000 | 2  | 0  |
| 150161000 | 9  | 0  |
| 150162000 | 0  | 0  |
| 150163000 | 1  | 4  |
| 150164000 | 3  | 0  |
| 150165000 | 0  | 0  |
| 150166000 | 6  | 0  |
| 150167000 | 5  | 2  |

|           |    |    |
|-----------|----|----|
| 150168000 | 5  | 0  |
| 150169000 | 3  | 0  |
| 150170000 | 0  | 0  |
| 150171000 | 2  | 2  |
| 150172000 | 62 | 3  |
| 150173000 | 2  | 0  |
| 150174000 | 50 | 5  |
| 150175000 | 1  | 5  |
| 150176000 | 7  | 0  |
| 150177000 | 2  | 0  |
| 150178000 | 3  | 0  |
| 150179000 | 2  | 0  |
| 150180000 | 5  | 0  |
| 150181000 | 13 | 2  |
| 150182000 | 7  | 2  |
| 150183000 | 4  | 6  |
| 150184000 | 3  | 0  |
| 150185000 | 0  | 0  |
| 150186000 | 1  | 0  |
| 150187000 | 4  | 0  |
| 150188000 | 3  | 0  |
| 150189000 | 8  | 0  |
| 150190000 | 0  | 2  |
| 150191000 | 5  | 2  |
| 150192000 | 1  | 0  |
| 150193000 | 5  | 0  |
| 150194000 | 10 | 0  |
| 150195000 | 2  | 3  |
| 150196000 | 1  | 0  |
| 150197000 | 3  | 0  |
| 150198000 | 1  | 0  |
| 150199000 | 8  | 0  |
| 150200000 | 1  | 0  |
| 150201000 | 5  | 3  |
| 150202000 | 12 | 0  |
| 150203000 | 6  | 1  |
| 150204000 | 3  | 0  |
| 150205000 | 1  | 0  |
| 150206000 | 26 | 4  |
| 150207000 | 3  | 0  |
| 150208000 | 1  | 0  |
| 150209000 | 3  | 7  |
| 150210000 | 1  | 1  |
| 150211000 | 3  | 0  |
| 150212000 | 2  | 0  |
| 150213000 | 5  | 0  |
| 150214000 | 23 | 0  |
| 150215000 | 30 | 4  |
| 150216000 | 1  | 1  |
| 150217000 | 6  | 1  |
| 150218000 | 1  | 2  |
| 150219000 | 14 | 8  |
| 150220000 | 16 | 7  |
| 150221000 | 0  | 1  |
| 150222000 | 10 | 1  |
| 150223000 | 7  | 10 |
| 150224000 | 3  | 8  |
| 150225000 | 12 | 2  |
| 150226000 | 9  | 0  |

|           |    |    |
|-----------|----|----|
| 150227000 | 21 | 4  |
| 150228000 | 13 | 0  |
| 150229000 | 1  | 0  |
| 150230000 | 6  | 13 |
| 150231000 | 1  | 0  |
| 150232000 | 8  | 3  |
| 150233000 | 6  | 8  |
| 150234000 | 5  | 3  |
| 150235000 | 0  | 0  |
| 150236000 | 9  | 0  |
| 150237000 | 13 | 0  |
| 150238000 | 5  | 0  |
| 150239000 | 7  | 0  |
| 150240000 | 16 | 0  |
| 150241000 | 8  | 0  |
| 150242000 | 2  | 0  |
| 150243000 | 11 | 0  |
| 150244000 | 14 | 0  |
| 150245000 | 10 | 4  |
| 150246000 | 12 | 0  |
| 150247000 | 2  | 0  |
| 150248000 | 20 | 0  |
| 150249000 | 6  | 0  |
| 150250000 | 5  | 0  |
| 150251000 | 5  | 0  |
| 150252000 | 5  | 0  |
| 150253000 | 4  | 0  |
| 150254000 | 2  | 4  |
| 150255000 | 1  | 0  |
| 150256000 | 6  | 0  |
| 150257000 | 7  | 2  |
| 150258000 | 5  | 1  |
| 150259000 | 2  | 0  |
| 150260000 | 15 | 0  |
| 150261000 | 21 | 14 |
| 150262000 | 4  | 0  |
| 150263000 | 5  | 0  |
| 150264000 | 4  | 0  |
| 150265000 | 2  | 0  |
| 150266000 | 8  | 4  |
| 150267000 | 5  | 0  |
| 150268000 | 23 | 11 |
| 150269000 | 5  | 2  |
| 150270000 | 3  | 1  |
| 150271000 | 7  | 0  |
| 150272000 | 7  | 2  |
| 150273000 | 2  | 5  |
| 150274000 | 8  | 1  |
| 150275000 | 6  | 15 |
| 150276000 | 7  | 0  |
| 150277000 | 12 | 2  |
| 150278000 | 12 | 1  |
| 150279000 | 14 | 1  |
| 150280000 | 6  | 1  |
| 150281000 | 8  | 0  |
| 150282000 | 12 | 3  |
| 150283000 | 5  | 0  |
| 150284000 | 18 | 10 |
| 150285000 | 0  | 0  |

|           |    |    |
|-----------|----|----|
| 150286000 | 3  | 3  |
| 150287000 | 6  | 5  |
| 150288000 | 1  | 0  |
| 150289000 | 4  | 0  |
| 150290000 | 18 | 0  |
| 150291000 | 6  | 3  |
| 150292000 | 16 | 5  |
| 150293000 | 24 | 15 |
| 150294000 | 4  | 1  |
| 150295000 | 1  | 0  |
| 150296000 | 5  | 2  |
| 150297000 | 0  | 0  |
| 150298000 | 8  | 0  |
| 150299000 | 4  | 0  |
| 150300000 | 1  | 0  |
| 150301000 | 2  | 0  |
| 150302000 | 7  | 5  |
| 150303000 | 4  | 0  |
| 150304000 | 3  | 0  |
| 150305000 | 6  | 2  |
| 150306000 | 0  | 0  |
| 150307000 | 0  | 0  |
| 150308000 | 8  | 0  |
| 150309000 | 9  | 1  |
| 150310000 | 11 | 4  |
| 150311000 | 14 | 1  |
| 150312000 | 1  | 0  |
| 150313000 | 0  | 0  |
| 150314000 | 9  | 0  |
| 150315000 | 10 | 1  |
| 150316000 | 14 | 2  |
| 150317000 | 0  | 0  |
| 150318000 | 15 | 0  |
| 150319000 | 3  | 0  |
| 150320000 | 3  | 0  |
| 150321000 | 30 | 2  |
| 150322000 | 5  | 0  |
| 150323000 | 13 | 10 |
| 150324000 | 12 | 7  |
| 150325000 | 0  | 18 |
| 150326000 | 0  | 0  |
| 150327000 | 0  | 0  |
| 150328000 | 15 | 0  |
| 150329000 | 2  | 0  |
| 150330000 | 2  | 0  |
| 150331000 | 9  | 0  |
| 150332000 | 15 | 1  |
| 150333000 | 7  | 2  |
| 150334000 | 24 | 2  |
| 150335000 | 2  | 0  |
| 150336000 | 3  | 0  |
| 150337000 | 4  | 0  |
| 150338000 | 0  | 8  |
| 150339000 | 13 | 3  |
| 150340000 | 6  | 0  |
| 150341000 | 6  | 0  |
| 150342000 | 1  | 0  |
| 150343000 | 0  | 0  |
| 150344000 | 4  | 0  |

|           |    |   |
|-----------|----|---|
| 150345000 | 14 | 0 |
| 150346000 | 5  | 0 |
| 150347000 | 2  | 0 |
| 150348000 | 3  | 0 |
| 150349000 | 4  | 0 |
| 150350000 | 5  | 0 |
| 150351000 | 0  | 0 |
| 150352000 | 9  | 1 |
| 150353000 | 3  | 5 |
| 150354000 | 0  | 1 |
| 150355000 | 0  | 0 |
| 150356000 | 1  | 0 |
| 150357000 | 0  | 0 |
| 150358000 | 0  | 0 |
| 150359000 | 0  | 0 |
| 150360000 | 2  | 0 |
| 150361000 | 0  | 0 |
| 150362000 | 5  | 0 |
| 150363000 | 5  | 0 |
| 150364000 | 1  | 0 |
| 150365000 | 7  | 6 |
| 150366000 | 11 | 0 |
| 150367000 | 1  | 0 |
| 150368000 | 1  | 0 |
| 150369000 | 2  | 0 |
| 150370000 | 0  | 1 |
| 150371000 | 1  | 0 |
| 150372000 | 19 | 2 |
| 150373000 | 0  | 0 |
| 150374000 | 6  | 7 |
| 150375000 | 4  | 1 |
| 150376000 | 0  | 0 |
| 150377000 | 17 | 3 |
| 150378000 | 10 | 0 |
| 150379000 | 5  | 4 |
| 150380000 | 0  | 1 |
| 150381000 | 4  | 4 |
| 150382000 | 0  | 0 |
| 150383000 | 5  | 0 |
| 150384000 | 0  | 2 |
| 150385000 | 6  | 0 |
| 150386000 | 9  | 0 |
| 150387000 | 1  | 0 |
| 150388000 | 7  | 0 |
| 150389000 | 1  | 0 |
| 150390000 | 2  | 3 |
| 150391000 | 7  | 0 |
| 150392000 | 2  | 0 |
| 150393000 | 8  | 8 |
| 150394000 | 3  | 9 |
| 150395000 | 10 | 2 |
| 150396000 | 4  | 0 |
| 150397000 | 3  | 0 |
| 150398000 | 5  | 0 |
| 150399000 | 0  | 0 |
| 150400000 | 1  | 1 |
| 150401000 | 1  | 9 |
| 150402000 | 4  | 0 |
| 150403000 | 12 | 0 |

|           |    |    |
|-----------|----|----|
| 150404000 | 1  | 0  |
| 150405000 | 0  | 0  |
| 150406000 | 1  | 0  |
| 150407000 | 1  | 6  |
| 150408000 | 2  | 0  |
| 150409000 | 3  | 13 |
| 150410000 | 1  | 0  |
| 150411000 | 5  | 0  |
| 150412000 | 5  | 0  |
| 150413000 | 6  | 0  |
| 150414000 | 0  | 0  |
| 150415000 | 0  | 0  |
| 150416000 | 3  | 0  |
| 150417000 | 4  | 0  |
| 150418000 | 1  | 0  |
| 150419000 | 6  | 0  |
| 150420000 | 4  | 2  |
| 150421000 | 3  | 0  |
| 150422000 | 4  | 0  |
| 150423000 | 3  | 0  |
| 150424000 | 4  | 6  |
| 150425000 | 6  | 1  |
| 150426000 | 6  | 4  |
| 150427000 | 1  | 0  |
| 150428000 | 60 | 0  |
| 150429000 | 97 | 8  |
| 150430000 | 44 | 10 |
| 150431000 | 56 | 0  |
| 150432000 | 38 | 0  |
| 150433000 | 26 | 0  |
| 150434000 | 0  | 0  |
| 150435000 | 11 | 0  |
| 150436000 | 9  | 1  |
| 150437000 | 2  | 0  |
| 150438000 | 6  | 0  |
| 150439000 | 5  | 2  |
| 150440000 | 9  | 0  |
| 150441000 | 16 | 0  |
| 150442000 | 2  | 0  |
| 150443000 | 12 | 0  |
| 150444000 | 3  | 0  |
| 150445000 | 7  | 0  |
| 150446000 | 7  | 0  |
| 150447000 | 3  | 0  |
| 150448000 | 5  | 0  |
| 150449000 | 0  | 0  |
| 150450000 | 4  | 0  |
| 150451000 | 5  | 0  |
| 150452000 | 9  | 2  |
| 150453000 | 16 | 0  |
| 150454000 | 16 | 3  |
| 150455000 | 8  | 0  |
| 150456000 | 14 | 0  |
| 150457000 | 15 | 1  |
| 150458000 | 4  | 0  |
| 150459000 | 38 | 11 |
| 150460000 | 4  | 0  |
| 150461000 | 7  | 0  |
| 150462000 | 3  | 0  |



|           |    |    |
|-----------|----|----|
| 150463000 | 55 | 8  |
| 150464000 | 1  | 3  |
| 150465000 | 19 | 0  |
| 150466000 | 12 | 0  |
| 150467000 | 24 | 6  |
| 150468000 | 15 | 0  |
| 150469000 | 10 | 0  |
| 150470000 | 14 | 4  |
| 150471000 | 2  | 4  |
| 150472000 | 12 | 3  |
| 150473000 | 4  | 9  |
| 150474000 | 4  | 0  |
| 150475000 | 4  | 0  |
| 150476000 | 8  | 0  |
| 150477000 | 5  | 0  |
| 150478000 | 12 | 0  |
| 150479000 | 7  | 0  |
| 150480000 | 10 | 0  |
| 150481000 | 3  | 0  |
| 150482000 | 43 | 23 |
| 150483000 | 66 | 3  |
| 150484000 | 23 | 0  |
| 150485000 | 22 | 0  |
| 150486000 | 31 | 0  |
| 150487000 | 23 | 0  |
| 150488000 | 31 | 0  |
| 150489000 | 8  | 2  |
| 150490000 | 12 | 0  |
| 150491000 | 14 | 0  |
| 150492000 | 37 | 2  |
| 150493000 | 16 | 0  |
| 150494000 | 10 | 1  |
| 150495000 | 10 | 5  |
| 150496000 | 19 | 2  |
| 150497000 | 3  | 0  |
| 150498000 | 10 | 14 |
| 150499000 | 3  | 0  |
| 150500000 | 9  | 0  |
| 150501000 | 55 | 0  |
| 150502000 | 17 | 3  |
| 150503000 | 7  | 0  |
| 150504000 | 21 | 6  |
| 150505000 | 12 | 0  |
| 150506000 | 5  | 3  |
| 150507000 | 3  | 8  |
| 150508000 | 17 | 5  |
| 150509000 | 8  | 0  |
| 150510000 | 7  | 0  |
| 150511000 | 22 | 0  |
| 150512000 | 9  | 0  |
| 150513000 | 12 | 0  |
| 150514000 | 10 | 0  |
| 150515000 | 17 | 0  |
| 150516000 | 4  | 0  |
| 150517000 | 3  | 0  |
| 150518000 | 10 | 0  |
| 150519000 | 14 | 0  |
| 150520000 | 8  | 0  |
| 150521000 | 6  | 1  |

|           |    |    |
|-----------|----|----|
| 150522000 | 5  | 0  |
| 150523000 | 10 | 0  |
| 150524000 | 6  | 3  |
| 150525000 | 33 | 0  |
| 150526000 | 27 | 0  |
| 150527000 | 22 | 1  |
| 150528000 | 8  | 7  |
| 150529000 | 9  | 0  |
| 150530000 | 18 | 0  |
| 150531000 | 9  | 0  |
| 150532000 | 14 | 0  |
| 150533000 | 6  | 0  |
| 150534000 | 5  | 0  |
| 150535000 | 10 | 0  |
| 150536000 | 5  | 1  |
| 150537000 | 7  | 5  |
| 150538000 | 0  | 0  |
| 150539000 | 9  | 0  |
| 150540000 | 6  | 0  |
| 150541000 | 1  | 0  |
| 150542000 | 11 | 12 |
| 150543000 | 2  | 0  |
| 150544000 | 11 | 0  |
| 150545000 | 3  | 0  |
| 150546000 | 6  | 0  |
| 150547000 | 17 | 8  |
| 150548000 | 10 | 1  |
| 150549000 | 0  | 0  |
| 150550000 | 9  | 0  |
| 150551000 | 5  | 0  |
| 150552000 | 0  | 6  |
| 150553000 | 8  | 6  |
| 150554000 | 7  | 0  |
| 150555000 | 9  | 0  |
| 150556000 | 9  | 0  |
| 150557000 | 31 | 3  |
| 150558000 | 45 | 5  |
| 150559000 | 27 | 12 |
| 150560000 | 24 | 8  |
| 150561000 | 7  | 0  |
| 150562000 | 5  | 0  |
| 150563000 | 13 | 2  |
| 150564000 | 9  | 0  |
| 150565000 | 19 | 4  |
| 150566000 | 32 | 7  |
| 150567000 | 17 | 2  |
| 150568000 | 23 | 0  |
| 150569000 | 39 | 3  |
| 150570000 | 13 | 0  |
| 150571000 | 14 | 0  |
| 150572000 | 30 | 0  |
| 150573000 | 24 | 1  |
| 150574000 | 9  | 0  |
| 150575000 | 4  | 1  |
| 150576000 | 7  | 8  |
| 150577000 | 4  | 0  |
| 150578000 | 4  | 0  |
| 150579000 | 13 | 2  |
| 150580000 | 7  | 3  |

|           |    |    |
|-----------|----|----|
| 150581000 | 3  | 7  |
| 150582000 | 11 | 0  |
| 150583000 | 9  | 0  |
| 150584000 | 12 | 2  |
| 150585000 | 1  | 0  |
| 150586000 | 32 | 0  |
| 150587000 | 3  | 0  |
| 150588000 | 0  | 0  |
| 150589000 | 5  | 1  |
| 150590000 | 8  | 9  |
| 150591000 | 9  | 0  |
| 150592000 | 34 | 0  |
| 150593000 | 0  | 0  |
| 150594000 | 1  | 0  |
| 150595000 | 8  | 0  |
| 150596000 | 0  | 0  |
| 150597000 | 2  | 0  |
| 150598000 | 2  | 0  |
| 150599000 | 3  | 0  |
| 150600000 | 1  | 0  |
| 150601000 | 7  | 0  |
| 150602000 | 6  | 0  |
| 150603000 | 9  | 3  |
| 150604000 | 6  | 0  |
| 150605000 | 13 | 11 |
| 150606000 | 1  | 3  |
| 150607000 | 1  | 0  |
| 150608000 | 0  | 0  |
| 150609000 | 8  | 0  |
| 150610000 | 5  | 4  |
| 150611000 | 1  | 6  |
| 150612000 | 19 | 6  |
| 150613000 | 5  | 7  |
| 150614000 | 15 | 0  |
| 150615000 | 4  | 0  |
| 150616000 | 17 | 2  |
| 150617000 | 18 | 4  |
| 150618000 | 9  | 0  |
| 150619000 | 5  | 0  |
| 150620000 | 3  | 0  |
| 150621000 | 1  | 0  |
| 150622000 | 6  | 0  |
| 150623000 | 0  | 0  |
| 150624000 | 6  | 0  |
| 150625000 | 3  | 0  |
| 150626000 | 5  | 0  |
| 150627000 | 38 | 0  |
| 150628000 | 0  | 0  |
| 150629000 | 2  | 0  |
| 150630000 | 3  | 0  |
| 150631000 | 1  | 12 |
| 150632000 | 1  | 0  |
| 150633000 | 2  | 0  |
| 150634000 | 0  | 9  |
| 150635000 | 4  | 7  |
| 150636000 | 2  | 0  |
| 150637000 | 4  | 0  |
| 150638000 | 4  | 5  |
| 150639000 | 15 | 4  |

|           |    |    |
|-----------|----|----|
| 150640000 | 9  | 0  |
| 150641000 | 4  | 0  |
| 150642000 | 6  | 8  |
| 150643000 | 8  | 2  |
| 150644000 | 11 | 0  |
| 150645000 | 9  | 0  |
| 150646000 | 16 | 0  |
| 150647000 | 9  | 0  |
| 150648000 | 8  | 0  |
| 150649000 | 4  | 0  |
| 150650000 | 26 | 16 |
| 150651000 | 10 | 0  |
| 150652000 | 0  | 0  |
| 150653000 | 0  | 0  |
| 150654000 | 0  | 0  |
| 150655000 | 2  | 2  |
| 150656000 | 5  | 0  |
| 150657000 | 2  | 0  |
| 150658000 | 10 | 0  |
| 150659000 | 5  | 1  |
| 150660000 | 3  | 0  |
| 150661000 | 4  | 0  |
| 150662000 | 11 | 0  |
| 150663000 | 2  | 0  |
| 150664000 | 7  | 0  |
| 150665000 | 4  | 3  |
| 150666000 | 2  | 0  |
| 150667000 | 11 | 0  |
| 150668000 | 1  | 0  |
| 150669000 | 2  | 0  |
| 150670000 | 0  | 5  |
| 150671000 | 3  | 0  |
| 150672000 | 1  | 0  |
| 150673000 | 9  | 0  |
| 150674000 | 1  | 0  |
| 150675000 | 3  | 0  |
| 150676000 | 0  | 0  |
| 150677000 | 2  | 0  |
| 150678000 | 14 | 0  |
| 150679000 | 2  | 0  |
| 150680000 | 1  | 0  |
| 150681000 | 3  | 0  |
| 150682000 | 1  | 0  |
| 150683000 | 0  | 0  |
| 150684000 | 6  | 0  |
| 150685000 | 4  | 0  |
| 150686000 | 7  | 0  |
| 150687000 | 4  | 0  |
| 150688000 | 6  | 0  |
| 150689000 | 4  | 0  |
| 150690000 | 7  | 0  |
| 150691000 | 17 | 0  |
| 150692000 | 10 | 4  |
| 150693000 | 5  | 2  |
| 150694000 | 12 | 0  |
| 150695000 | 11 | 5  |
| 150696000 | 6  | 0  |
| 150697000 | 15 | 0  |
| 150698000 | 17 | 0  |

|           |    |    |
|-----------|----|----|
| 150699000 | 4  | 1  |
| 150700000 | 9  | 0  |
| 150701000 | 2  | 0  |
| 150702000 | 8  | 0  |
| 150703000 | 16 | 2  |
| 150704000 | 9  | 4  |
| 150705000 | 5  | 4  |
| 150706000 | 11 | 0  |
| 150707000 | 10 | 1  |
| 150708000 | 11 | 0  |
| 150709000 | 5  | 0  |
| 150710000 | 9  | 0  |
| 150711000 | 5  | 0  |
| 150712000 | 16 | 3  |
| 150713000 | 6  | 0  |
| 150714000 | 8  | 0  |
| 150715000 | 4  | 0  |
| 150716000 | 2  | 0  |
| 150717000 | 0  | 0  |
| 150718000 | 7  | 0  |
| 150719000 | 10 | 0  |
| 150720000 | 5  | 0  |
| 150721000 | 4  | 6  |
| 150722000 | 13 | 0  |
| 150723000 | 11 | 2  |
| 150724000 | 8  | 0  |
| 150725000 | 3  | 0  |
| 150726000 | 6  | 0  |
| 150727000 | 22 | 15 |
| 150728000 | 38 | 4  |
| 150729000 | 5  | 0  |
| 150730000 | 10 | 0  |
| 150731000 | 8  | 0  |
| 150732000 | 6  | 8  |
| 150733000 | 8  | 10 |
| 150734000 | 8  | 1  |
| 150735000 | 5  | 0  |
| 150736000 | 13 | 7  |
| 150737000 | 2  | 0  |
| 150738000 | 4  | 0  |
| 150739000 | 2  | 0  |
| 150740000 | 7  | 2  |
| 150741000 | 5  | 0  |
| 150742000 | 7  | 4  |
| 150743000 | 7  | 4  |
| 150744000 | 14 | 0  |
| 150745000 | 8  | 0  |
| 150746000 | 6  | 0  |
| 150747000 | 12 | 0  |
| 150748000 | 22 | 0  |
| 150749000 | 8  | 0  |
| 150750000 | 9  | 0  |
| 150751000 | 16 | 4  |
| 150752000 | 10 | 0  |
| 150753000 | 16 | 1  |
| 150754000 | 8  | 0  |
| 150755000 | 1  | 0  |
| 150756000 | 27 | 0  |
| 150757000 | 28 | 2  |

|           |     |    |
|-----------|-----|----|
| 150758000 | 18  | 0  |
| 150759000 | 29  | 15 |
| 150760000 | 24  | 0  |
| 150761000 | 70  | 0  |
| 150762000 | 37  | 21 |
| 150763000 | 35  | 2  |
| 150764000 | 35  | 0  |
| 150765000 | 31  | 0  |
| 150766000 | 24  | 3  |
| 150767000 | 47  | 0  |
| 150768000 | 49  | 5  |
| 150769000 | 48  | 5  |
| 150770000 | 94  | 0  |
| 150771000 | 106 | 1  |
| 150772000 | 244 | 0  |
| 150773000 | 182 | 0  |
| 150774000 | 187 | 11 |
| 150775000 | 10  | 0  |
| 150776000 | 3   | 0  |
| 150777000 | 2   | 0  |
| 150778000 | 6   | 4  |
| 150779000 | 7   | 0  |
| 150780000 | 4   | 1  |
| 150781000 | 0   | 7  |
| 150782000 | 1   | 4  |
| 150783000 | 4   | 0  |
| 150784000 | 3   | 0  |
| 150785000 | 2   | 3  |
| 150786000 | 0   | 19 |
| 150787000 | 3   | 3  |
| 150788000 | 4   | 0  |
| 150789000 | 0   | 6  |
| 150790000 | 2   | 1  |
| 150791000 | 0   | 0  |
| 150792000 | 0   | 2  |
| 150793000 | 0   | 3  |
| 150794000 | 0   | 0  |
| 150795000 | 0   | 0  |
| 150796000 | 2   | 0  |
| 150797000 | 3   | 0  |
| 150798000 | 2   | 0  |
| 150799000 | 0   | 0  |

**Supplemental table 2: Primers**

| Name      | Sequence                  | Location(hg19)      | Application                                 |
|-----------|---------------------------|---------------------|---------------------------------------------|
| 150429870 | ATGCTTGGGAAGGAAGTGGTG     | 150429849 150429870 | RPRD2 Breakpoint                            |
| 150425835 | AGAGATGGAAGTGCTGGGAGACTG  | 150425835 150425858 | RPRD2 Breakpoint                            |
| 150428618 | CTGGGAGGTCAGATGCTATTGTTT  | 150428618 150428641 | RPRD2 Breakpoint Confirmation               |
| 150425953 | CAGTGGCTTAGAGAGAATGGACCC  | 150425953 150425976 | RPRD2 Breakpoint Confirmation               |
| 150558521 | AAACTTTGCCCCACCACTC       | 150558502 150558521 | MCL1 Breakpoint                             |
| 150554876 | CGCCGTATCACCTTACTAACTGTG  | 150554852 150554876 | MCL1 Breakpoint                             |
| 150558550 | AAGCCCTTCACAATCTGTC       | 150558532 150558550 | MCL1 Breakpoint Confirmation (External)     |
| 150554906 | CCTGCCAAAACATAAATGG       | 150554887 150554906 | MCL1 Breakpoint Confirmation (External)     |
| 150558521 | AAACTTTGCCCCACCACTC       | 150558502 150558521 | MCL1 Breakpoint Confirmation (Nested)       |
| 150554875 | GCCGTATCACCTTACTAACTG     | 150554854 150554875 | MCL1 Breakpoint Confirmation (Nested)       |
| 150483170 | CTGAAAGGAAAAGAGAAGCGAGG   | 150483170 150483192 | TARS2_ECM1 Breakpoint                       |
| 150480220 | GGGAGCAGGAAACCTATCCAAG    | 150480220 150480241 | TARS2_ECM1 Breakpoint                       |
| 150482233 | TGGGATGGTGACCTTACCTTGAC   | 150482233 150482255 | TARS2_ECM1 Breakpoint Confirmation          |
| 150480263 | AACTGGGGTTGGGGAAACAG      | 150480263 150480282 | TARS2_ECM1 Breakpoint Confirmation          |
| 150526529 | GAATAGGGCTACTGGGAGCAAAG   | 150526529 150526551 | ADAMTSL4 Breakpoint                         |
| 150523062 | GGGAAGAAGAAATGGGGTGATAGTC | 150523062 150523086 | ADAMTSL4 Breakpoint                         |
| 150526063 | TTGCGGAGAATGGCTCTGCTCTTG  | 150526063 150526086 | ADAMTSL4 Breakpoint Confirmation (External) |
| 150522489 | ATGGAGAATCCCTGTCTGAGTCC   | 150522489 150522512 | ADAMTSL4 Breakpoint Confirmation (External) |
| 150526045 | TCTTGGAGTAGGGACGGAATAG    | 150526045 150526067 | ADAMTSL4 Breakpoint Confirmation (Nested)   |
| 150522397 | TGTCAACCTCTTCTGCCATCGG    | 150522397 150522418 | ADAMTSL4 Breakpoint Confirmation (Nested)   |
